# Supplementary material
Source: PubMed Central journal article supplement (PMC8316027)
Supplement: aem.00442-21-s0001.pdf [file aem.00442-21-s0001.pdf]

1 **Supplementary materials**

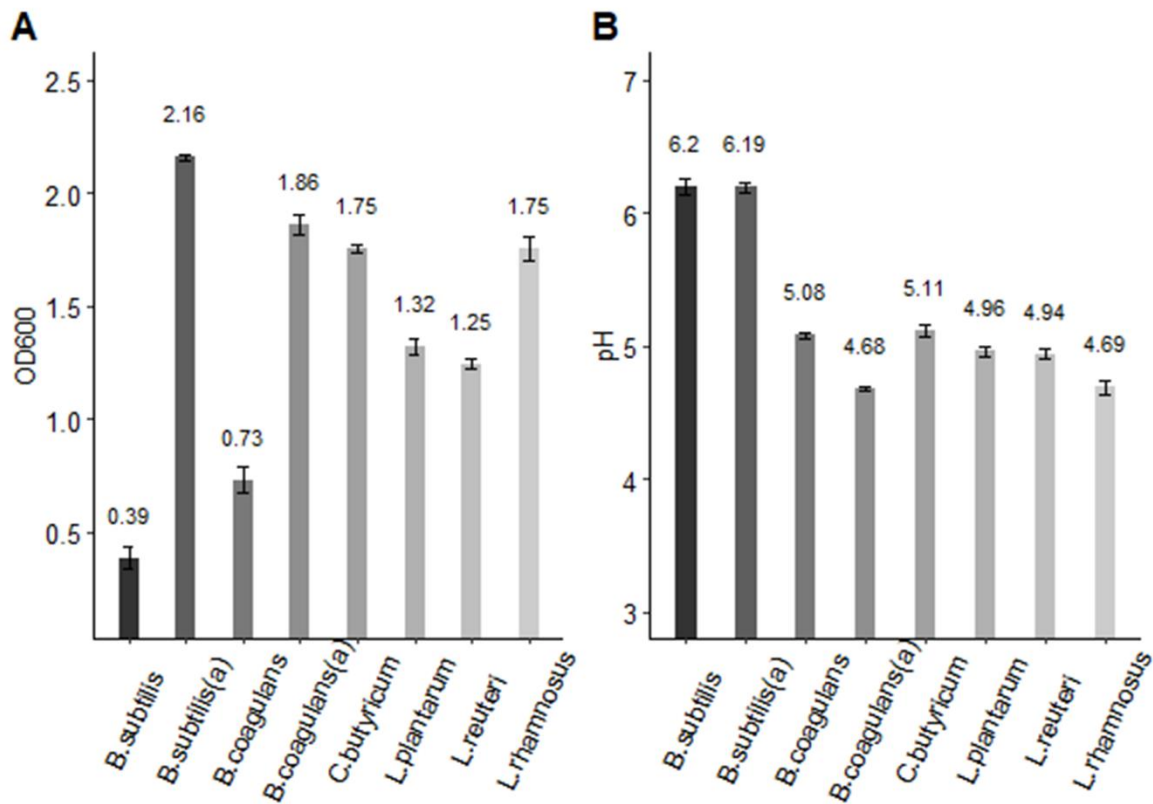

2

3 **Fig. S1.** Growth status (OD<sub>600</sub>) (A) and pH value (B) of all probiotics used in this study.

4 All probiotics were cultured with M9B medium at 37 °C for 24 hours. All *Lactobacillus* spp. and

5 *C. butyricum* MIYAIRI 588 were cultured under anaerobic conditions. *B. coagulans* and *B.*

6 *subtilis* natto NTU-18 were cultured under both anaerobic and aerobic conditions. “(a)” indicates

7 aerobic culture. As shown in this figure, *B. subtilis* natto and *B. coagulans* grew much slower

8 under anaerobic conditions than under aerobic conditions. The OD<sub>600</sub> of anaerobically cultured

9 *B. subtilis* natto was 0.39±0.05, and the OD<sub>600</sub> of anaerobically cultured *B. coagulans* was

10 0.74±0.06.

11

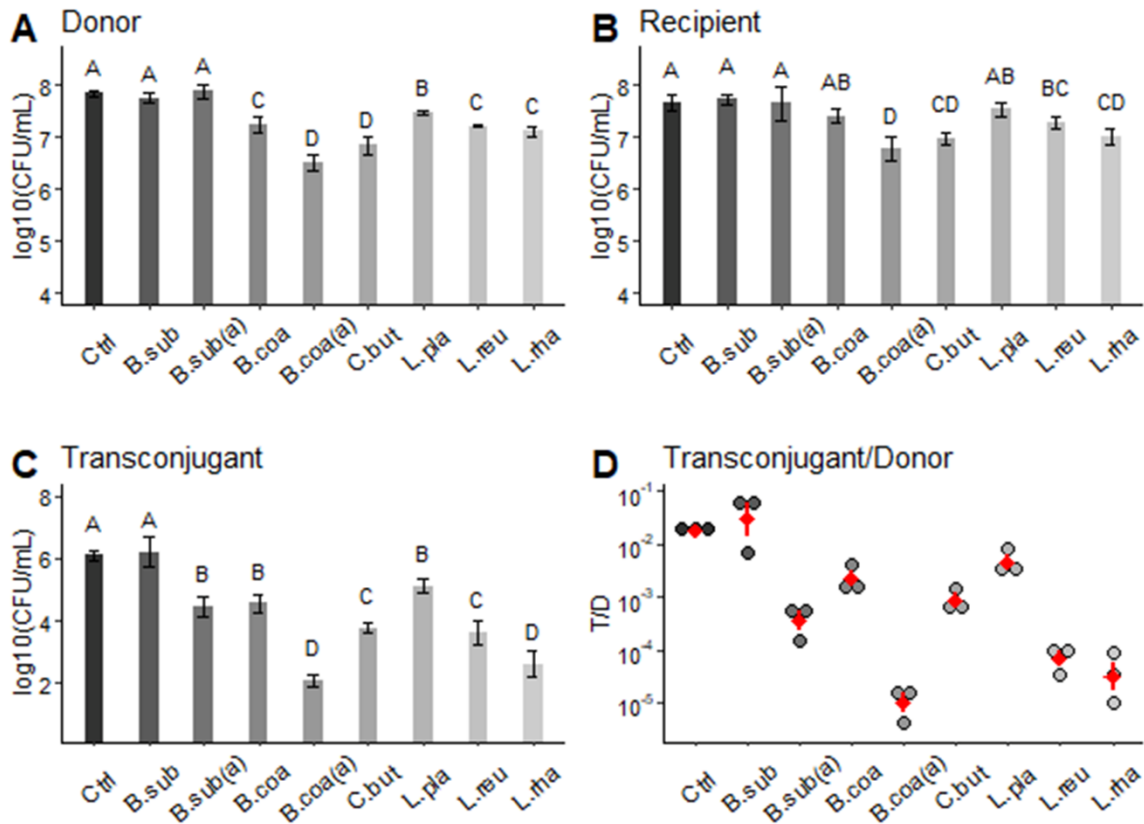

12

13 **Fig. S2.** Concentrations of donors (A), recipients (B), and transconjugants (C) and frequency of

14 pCF10 transfer (transconjugants per donor, T/D) (D) after 4-hr mating assays with different

15 probiotic SCS treatments. (A-C) The Y axis shows the concentrations of donors, recipients and

16 transconjugants as  $\log_{10}(\text{CFU/mL})$ . Data are presented as the means±SDs (n=3). Multiple

17 comparisons were evaluated using Duncan's multiple range test. The different uppercase letters

18 above the bars or dots indicate the significance of differences between groups ( $p < 0.05$ ). (D) The

19 Y axis shows the number of transconjugants/donor (T/D). Each dot in the figure represents a  
20 replicate (n=3 for each group). Red diamonds with red lines represent the means±SDs (n=3).  
21 Ctrl: the group treated with fresh M9B medium (no SCS treatment), *B. sub*: *B. subtilis* natto, *B.*  
22 *coa*: *B. coagulans*, *C. but*: *C. butyricum*, *L. pla*: *L. plantarum*, *L. reu*: *L. reuteri*, *L. rha*: *L.*  
23 *rhamnosus*. “(a)” indicates aerobic culture.

24

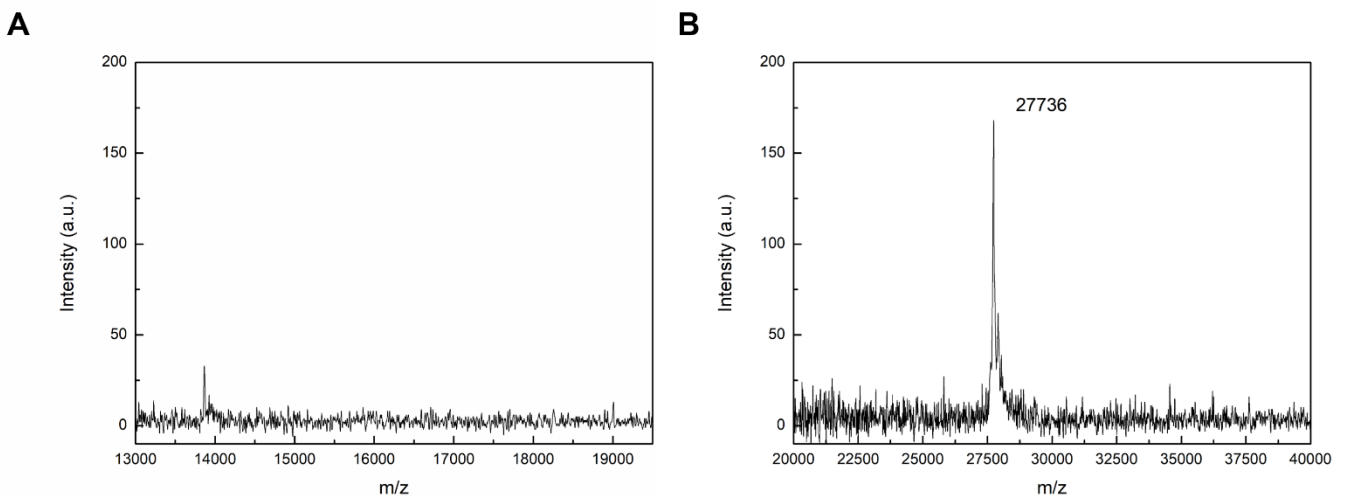

25

26 **Fig. S3.** Use of mass spectrometry to ensure the purity of nattokinase used in this study: (A) m/z  
27 between 13000 and 20000 and (B) m/z between 20000 and 40000. The m/z (27736) was similar  
28 to that of nattokinase (theoretical MW: 27698.69). The change in mass from 27736 to 27698.69  
29 may result from modification of the protein with 3-chlorination (mass change: 34) or potassium  
30 (mass change: 36). In addition, as shown in the two mass spectra above, significant  
31 contamination with other proteins was not observed in our purified nattokinase.

32

33 **TABLE S1** Mascot results for protein identification by peptide mass fingerprinting of the

34 nattoxinase tryptic digest analyzed using MALDI-TOF/TOF-MS

**Mascot Search Results** (Mascot: <http://www.matrixscience.com/>)**Protein View: ABM97611.1****Nattoxinase, partial [*Bacillus subtilis*]**

|                                |                                    |
|--------------------------------|------------------------------------|
| <b>Database:</b>               | NCBIprot                           |
| <b>Score:</b>                  | 1702                               |
| <b>Monoisotopic mass (Mr):</b> | 27682                              |
| <b>Calculated pI:</b>          | 6.30                               |
| <b>Taxonomy:</b>               | <i>Bacillus subtilis</i>           |
| <b>Search parameters</b>       |                                    |
| <b>Enzyme:</b>                 | Trypsin                            |
| <b>Variable modifications:</b> | Carbamidomethyl (C), Oxidation (M) |

**Protein sequence coverage: 46%**Matched peptides are shown in **bold red**.

**1 A QSVPYGISQ IKAPALHSQG YTGSNVAV IDSGIDSSHP DLNVRGGASG**  
**51 VPSETNPYQD GSSHGTHAAG TIAALNNSIG VLGVAPSASL YAVKVL DSTG**  
**101 SGQYSWIING IEWAISSNMD VINMSLGGPT GSTALKTVVD KAVSSGIVVA**  
**151 AAAGNEGSSG STSTVGYPK YPSTIAGAV NSSNQRASFS SVGSELDVMA**  
**201 PGVSIQSTLP GGTYGAYNGT SMATPHVAGA AALILSKHPT WTNAQVRDRL**  
**251 ESTATYLGNS FYYGKGLINV QAAAQ**

| Query       | Start – End | Observed | Mr (expt) | Mr (calc) | ppm   | M | Score | Expect  | Rank | U | Peptide                |
|-------------|-------------|----------|-----------|-----------|-------|---|-------|---------|------|---|------------------------|
| <u>1851</u> | 1–12        | 645.8546 | 1289.6945 | 1289.6979 | -2.63 | 0 | 57    | 9.2e-05 | 1    | U | -A QSVPYGISQIK.A       |
| <u>3191</u> | 13–27       | 765.3864 | 1528.7581 | 1528.7634 | -3.43 | 0 | 85    | 2.5e-08 | 1    |   | K.APALHSQGYTGSNVK.V    |
| <u>3194</u> | 13–27       | 510.5940 | 1528.7601 | 1528.7634 | -2.19 | 0 | 28    | 0.0027  | 1    |   | K.APALHSQGYTGSNVK.V    |
| <u>3196</u> | 13–27       | 765.3880 | 1528.7614 | 1528.7634 | -1.27 | 0 | 54    | 1.8e-05 | 1    |   | K.APALHSQGYTGSNVK.V    |
| <u>4966</u> | 28–45       | 947.4820 | 1892.9494 | 1892.9592 | -5.17 | 0 | 45    | 6e-05   | 1    |   | K.VAVIDSGIDSSHPDLNVR.G |

|             |           |           |           |           |       |   |     |         |   |                                       |
|-------------|-----------|-----------|-----------|-----------|-------|---|-----|---------|---|---------------------------------------|
| <u>4968</u> | 28-45     | 631.9916  | 1892.9531 | 1892.9592 | -3.23 | 0 | 26  | 0.0059  | 1 | K.VAVIDSGIDSSHPDLNVR.G                |
| <u>4969</u> | 28-45     | 947.4839  | 1892.9532 | 1892.9592 | -3.16 | 0 | 106 | 1.1e-10 | 1 | K.VAVIDSGIDSSHPDLNVR.G                |
| <u>4972</u> | 28-45     | 631.9919  | 1892.9538 | 1892.9592 | -2.85 | 0 | 43  | 0.00042 | 1 | K.VAVIDSGIDSSHPDLNVR.G                |
| <u>4973</u> | 28-45     | 631.9920  | 1892.9542 | 1892.9592 | -2.66 | 0 | 29  | 0.0019  | 1 | K.VAVIDSGIDSSHPDLNVR.G                |
| <u>4975</u> | 28-45     | 631.9922  | 1892.9549 | 1892.9592 | -2.27 | 0 | 26  | 0.0038  | 1 | K.VAVIDSGIDSSHPDLNVR.G                |
| <u>4977</u> | 28-45     | 631.9924  | 1892.9553 | 1892.9592 | -2.08 | 0 | 40  | 0.00059 | 1 | K.VAVIDSGIDSSHPDLNVR.G                |
| <u>4979</u> | 28-45     | 631.9924  | 1892.9555 | 1892.9592 | -1.98 | 0 | 41  | 0.00056 | 1 | K.VAVIDSGIDSSHPDLNVR.G                |
| <u>4980</u> | 28-45     | 947.4852  | 1892.9558 | 1892.9592 | -1.81 | 0 | 32  | 0.00091 | 1 | K.VAVIDSGIDSSHPDLNVR.G                |
| <u>4981</u> | 28-45     | 631.9926  | 1892.9560 | 1892.9592 | -1.70 | 0 | 52  | 2.3e-05 | 1 | K.VAVIDSGIDSSHPDLNVR.G                |
| <u>4982</u> | 28-45     | 631.9927  | 1892.9564 | 1892.9592 | -1.49 | 0 | 32  | 0.0039  | 1 | K.VAVIDSGIDSSHPDLNVR.G                |
| <u>4984</u> | 28-45     | 631.9931  | 1892.9575 | 1892.9592 | -0.92 | 0 | 30  | 0.0045  | 1 | K.VAVIDSGIDSSHPDLNVR.G                |
| <u>4985</u> | 28-45     | 631.9931  | 1892.9575 | 1892.9592 | -0.92 | 0 | 30  | 0.0016  | 1 | K.VAVIDSGIDSSHPDLNVR.G                |
| <u>4988</u> | 28-45     | 631.9935  | 1892.9588 | 1892.9592 | -0.24 | 0 | 32  | 0.0033  | 1 | K.VAVIDSGIDSSHPDLNVR.G                |
| <u>4989</u> | 28-45     | 631.9938  | 1892.9597 | 1892.9592 | 0.25  | 0 | 49  | 3.5e-05 | 1 | K.VAVIDSGIDSSHPDLNVR.G                |
| <u>7063</u> | 142 - 170 | 1298.1433 | 2594.2721 | 2594.2824 | -3.98 | 0 | 120 | 1.3e-10 | 1 | K.AVSSGIVVAAAAGNEGSSGSTSTV<br>GYPAK.Y |
| <u>7064</u> | 142 - 170 | 1298.1434 | 2594.2723 | 2594.2824 | -3.89 | 0 | 76  | 3.5e-06 | 1 | K.AVSSGIVVAAAAGNEGSSGSTST<br>VGYPK.Y  |
| <u>7066</u> | 142 - 170 | 865.7648  | 2594.2727 | 2594.2824 | -3.75 | 0 | 67  | 2.8e-05 | 1 | K.AVSSGIVVAAAAGNEGSSGSTST<br>VGYPK.Y  |
| <u>7067</u> | 142 - 170 | 1298.1438 | 2594.2730 | 2594.2824 | -3.60 | 0 | 83  | 6.8e-07 | 1 | K.AVSSGIVVAAAAGNEGSSGSTST<br>VGYPK.Y  |
| <u>7069</u> | 142 - 170 | 649.5759  | 2594.2744 | 2594.2824 | -3.09 | 0 | 37  | 0.00078 | 2 | K.AVSSGIVVAAAAGNEGSSGSTST<br>VGYPK.Y  |
| <u>7071</u> | 142 - 170 | 865.7654  | 2594.2745 | 2594.2824 | -3.05 | 0 | 53  | 0.00067 | 1 | K.AVSSGIVVAAAAGNEGSSGSTST<br>VGYPK.Y  |
| <u>7072</u> | 142 - 170 | 865.7654  | 2594.2745 | 2594.2824 | -3.05 | 0 | 54  | 0.00052 | 1 | K.AVSSGIVVAAAAGNEGSSGSTSTV<br>GYPAK.Y |
| <u>7078</u> | 142 - 170 | 865.7659  | 2594.2758 | 2594.2824 | -2.55 | 0 | 47  | 0.0028  | 1 | K.AVSSGIVVAAAAGNEGSSGSTST<br>VGYPK.Y  |
| <u>7081</u> | 142 - 170 | 865.7664  | 2594.2773 | 2594.2824 | -1.98 | 0 | 68  | 2.4e-05 | 1 | K.AVSSGIVVAAAAGNEGSSGSTSTV<br>GYPAK.Y |
| <u>7082</u> | 142 - 170 | 865.7664  | 2594.2774 | 2594.2824 | -1.91 | 0 | 46  | 0.0039  | 1 | K.AVSSGIVVAAAAGNEGSSGSTSTV            |

|             |           |           |           |           |       |   |     |         |   | GYPAK.Y                |
|-------------|-----------|-----------|-----------|-----------|-------|---|-----|---------|---|------------------------|
| <u>3852</u> | 171 – 186 | 832.4206  | 1662.8266 | 1662.8325 | -3.55 | 0 | 71  | 3.6e-07 | 1 | K.YPSTIAVGAVNSSNQR.A   |
| <u>3853</u> | 171 – 186 | 555.2828  | 1662.8267 | 1662.8325 | -3.51 | 0 | 54  | 0.0002  | 1 | K.YPSTIAVGAVNSSNQR.A   |
| <u>3854</u> | 171 – 186 | 832.4206  | 1662.8267 | 1662.8325 | -3.48 | 0 | 108 | 1.7e-10 | 1 | K.YPSTIAVGAVNSSNQR.A   |
| <u>3857</u> | 171 – 186 | 832.4209  | 1662.8272 | 1662.8325 | -3.18 | 0 | 81  | 1.2e-07 | 1 | K.YPSTIAVGAVNSSNQR.A   |
| <u>3858</u> | 171 – 186 | 832.4209  | 1662.8272 | 1662.8325 | -3.18 | 0 | 97  | 1.2e-08 | 1 | K.YPSTIAVGAVNSSNQR.A   |
| <u>3861</u> | 171 – 186 | 832.4214  | 1662.8282 | 1662.8325 | -2.59 | 0 | 58  | 1.1e-05 | 1 | K.YPSTIAVGAVNSSNQR.A   |
| <u>3862</u> | 171 – 186 | 832.4214  | 1662.8282 | 1662.8325 | -2.59 | 0 | 101 | 1.1e-09 | 1 | K.YPSTIAVGAVNSSNQR.A   |
| <u>3865</u> | 171 – 186 | 555.2835  | 1662.8287 | 1662.8325 | -2.31 | 0 | 38  | 0.0051  | 1 | K.YPSTIAVGAVNSSNQR.A   |
| <u>3866</u> | 171 – 186 | 555.2836  | 1662.8289 | 1662.8325 | -2.20 | 0 | 39  | 0.0019  | 1 | K.YPSTIAVGAVNSSNQR.A   |
| <u>3867</u> | 171 – 186 | 832.4218  | 1662.8291 | 1662.8325 | -2.08 | 0 | 60  | 2.3e-06 | 1 | K.YPSTIAVGAVNSSNQR.A   |
| <u>3868</u> | 171 – 186 | 832.4219  | 1662.8292 | 1662.8325 | -2.00 | 0 | 69  | 2.8e-06 | 1 | K.YPSTIAVGAVNSSNQR.A   |
| <u>3869</u> | 171 – 186 | 832.4219  | 1662.8292 | 1662.8325 | -2.00 | 0 | 69  | 5.1e-07 | 1 | K.YPSTIAVGAVNSSNQR.A   |
| <u>3871</u> | 171 – 186 | 832.4220  | 1662.8294 | 1662.8325 | -1.86 | 0 | 83  | 6.7e-08 | 1 | K.YPSTIAVGAVNSSNQR.A   |
| <u>3872</u> | 171 – 186 | 832.4221  | 1662.8296 | 1662.8325 | -1.78 | 0 | 83  | 3.4e-07 | 1 | K.YPSTIAVGAVNSSNQR.A   |
| <u>3874</u> | 171 – 186 | 832.4221  | 1662.8297 | 1662.8325 | -1.71 | 0 | 89  | 1.3e-08 | 1 | K.YPSTIAVGAVNSSNQR.A   |
| <u>3875</u> | 171 – 186 | 832.4221  | 1662.8297 | 1662.8325 | -1.71 | 0 | 76  | 3.2e-07 | 1 | K.YPSTIAVGAVNSSNQR.A   |
| <u>3876</u> | 171 – 186 | 832.4223  | 1662.8300 | 1662.8325 | -1.50 | 0 | 70  | 2.7e-07 | 1 | K.YPSTIAVGAVNSSNQR.A   |
| <u>3880</u> | 171 – 186 | 832.4228  | 1662.8310 | 1662.8325 | -0.91 | 0 | 55  | 1.3e-05 | 1 | K.YPSTIAVGAVNSSNQR.A   |
| <u>3881</u> | 171 – 186 | 832.4228  | 1662.8310 | 1662.8325 | -0.91 | 0 | 77  | 6.4e-08 | 1 | K.YPSTIAVGAVNSSNQR.A   |
| <u>3884</u> | 171 – 186 | 832.4240  | 1662.8335 | 1662.8325 | 0.56  | 0 | 73  | 7.3e-06 | 1 | K.YPSTIAVGAVNSSNQR.A   |
| <u>1459</u> | 238 – 247 | 605.3079  | 1208.6012 | 1208.6051 | -3.22 | 0 | 46  | 0.0004  | 1 | K.HPTWTNAQVR.D         |
| <u>5653</u> | 248 – 265 | 1042.9965 | 2083.9784 | 2083.9851 | -3.21 | 1 | 78  | 4.7e-08 | 1 | R.DRLESTATYLGNSFYYGK.G |
| <u>5655</u> | 248 – 265 | 695.6673  | 2083.9801 | 2083.9851 | -2.39 | 1 | 28  | 0.0026  | 1 | R.DRLESTATYLGNSFYYGK.G |
| <u>5656</u> | 248 – 265 | 695.6673  | 2083.9801 | 2083.9851 | -2.39 | 1 | 31  | 0.0014  | 1 | R.DRLESTATYLGNSFYYGK.G |
| <u>5657</u> | 248 – 265 | 695.6675  | 2083.9806 | 2083.9851 | -2.14 | 1 | 39  | 0.00083 | 1 | R.DRLESTATYLGNSFYYGK.G |
| <u>5658</u> | 248 – 265 | 695.6675  | 2083.9806 | 2083.9851 | -2.14 | 1 | 57  | 5.4e-06 | 1 | R.DRLESTATYLGNSFYYGK.G |
| <u>5661</u> | 248 – 265 | 695.6676  | 2083.9810 | 2083.9851 | -1.96 | 1 | 50  | 2.2e-05 | 1 | R.DRLESTATYLGNSFYYGK.G |
| <u>5662</u> | 248 – 265 | 695.6677  | 2083.9812 | 2083.9851 | -1.88 | 1 | 36  | 0.00038 | 1 | R.DRLESTATYLGNSFYYGK.G |
| <u>5664</u> | 248 – 265 | 695.6678  | 2083.9815 | 2083.9851 | -1.69 | 1 | 25  | 0.0047  | 1 | R.DRLESTATYLGNSFYYGK.G |

|             |           |           |           |           |       |   |    |         |   |                        |
|-------------|-----------|-----------|-----------|-----------|-------|---|----|---------|---|------------------------|
| <u>5666</u> | 248 – 265 | 695.6678  | 2083.9817 | 2083.9851 | -1.60 | 1 | 44 | 6.9e-05 | 1 | R.DRLESTATYLGNSFYYGK.G |
| <u>5668</u> | 248 – 265 | 695.6680  | 2083.9821 | 2083.9851 | -1.43 | 1 | 44 | 7.1e-05 | 1 | R.DRLESTATYLGNSFYYGK.G |
| <u>5669</u> | 248 – 265 | 695.6681  | 2083.9824 | 2083.9851 | -1.26 | 1 | 24 | 0.0053  | 1 | R.DRLESTATYLGNSFYYGK.G |
| <u>5670</u> | 248 – 265 | 1042.9985 | 2083.9825 | 2083.9851 | -1.22 | 1 | 51 | 1.6e-05 | 1 | R.DRLESTATYLGNSFYYGK.G |
| <u>4614</u> | 250 – 265 | 907.4330  | 1812.8515 | 1812.8570 | -3.02 | 0 | 80 | 3.3e-08 | 1 | R.LESTATYLGNSFYYGK.G   |
| <u>4615</u> | 250 – 265 | 605.2918  | 1812.8536 | 1812.8570 | -1.88 | 0 | 24 | 0.0055  | 1 | R.LESTATYLGNSFYYGK.G   |
| <u>519</u>  | 266 – 275 | 492.7756  | 983.5366  | 983.5400  | -3.39 | 0 | 37 | 0.0037  | 1 | U K.GLINVQAAAQ.-       |
| <u>524</u>  | 266 – 275 | 492.7761  | 983.5377  | 983.5400  | -2.33 | 0 | 49 | 0.00021 | 1 | U K.GLINVQAAAQ.-       |
| <u>526</u>  | 266 – 275 | 492.7761  | 983.5377  | 983.5400  | -2.33 | 0 | 40 | 0.0021  | 1 | U K.GLINVQAAAQ.-       |
| <u>528</u>  | 266 – 275 | 492.7762  | 983.5379  | 983.5400  | -2.06 | 0 | 36 | 0.0057  | 1 | U K.GLINVQAAAQ.-       |
| <u>530</u>  | 266 – 275 | 492.7763  | 983.5381  | 983.5400  | -1.88 | 0 | 34 | 0.0056  | 1 | U K.GLINVQAAAQ.-       |
| <u>532</u>  | 266 – 275 | 492.7765  | 983.5384  | 983.5400  | -1.64 | 0 | 31 | 0.0041  | 1 | U K.GLINVQAAAQ.-       |

---
